# Supplementary material for: Silica–F127 nanohybrid-encapsulated manganese oxide nanoparticles for optimized T1magnetic resonance relaxivity
Source: Royal Society of Chemistry journal article supplement (doi:10.1039/c3nr04378a), 2013-10-09
Supplement: c3nr04378a.pdf [file c3nr04378a.pdf]

## Supplementary data

### Silica-F127 Nanohybrid-encapsulated Manganese Oxide Nanoparticles for Optimized T1 Magnetic Resonance Relaxivity

Benedict You Wei Hsu,<sup>a</sup> Miao Wang,<sup>b</sup> Yu Zhang,<sup>c</sup> Vimalan Vijayaragavan,<sup>d</sup> Siew Yee Wong,<sup>e</sup> Alex Yuang-Chi Chang,<sup>b</sup> Kishore Kumar Bhakoo,<sup>d</sup> Xu Li<sup>\*e</sup> and John Wang<sup>\*d,c</sup>

<sup>a</sup>NUS Graduate School for Integrative Sciences and Engineering (NGS), National University of Singapore, 28 Medical Drive Singapore 117456. E-mail: msewangj@nus.edu.sg

<sup>b</sup>Johns Hopkins Singapore International Medical Center, 11 Jalan Tan Tock Seng, Singapore 308433.

<sup>c</sup>Department of Materials Science & Engineering, National University of Singapore, 9 Engineering Drive 1 Singapore 117576.

<sup>d</sup>Translational Molecular Imaging Group, Singapore Bioimaging Consortium, Agency for Science, Technology and Research (A\*STAR), 11 Biopolis Way, 02-02 Helios, Singapore 138667.

<sup>e</sup>Institute of Materials Research and Engineering (IMRE), Agency for Science, Technology and Research (A\*STAR), 3 Research Link Singapore 117602. E-mail: x-li@imre.a-star.edu.sg

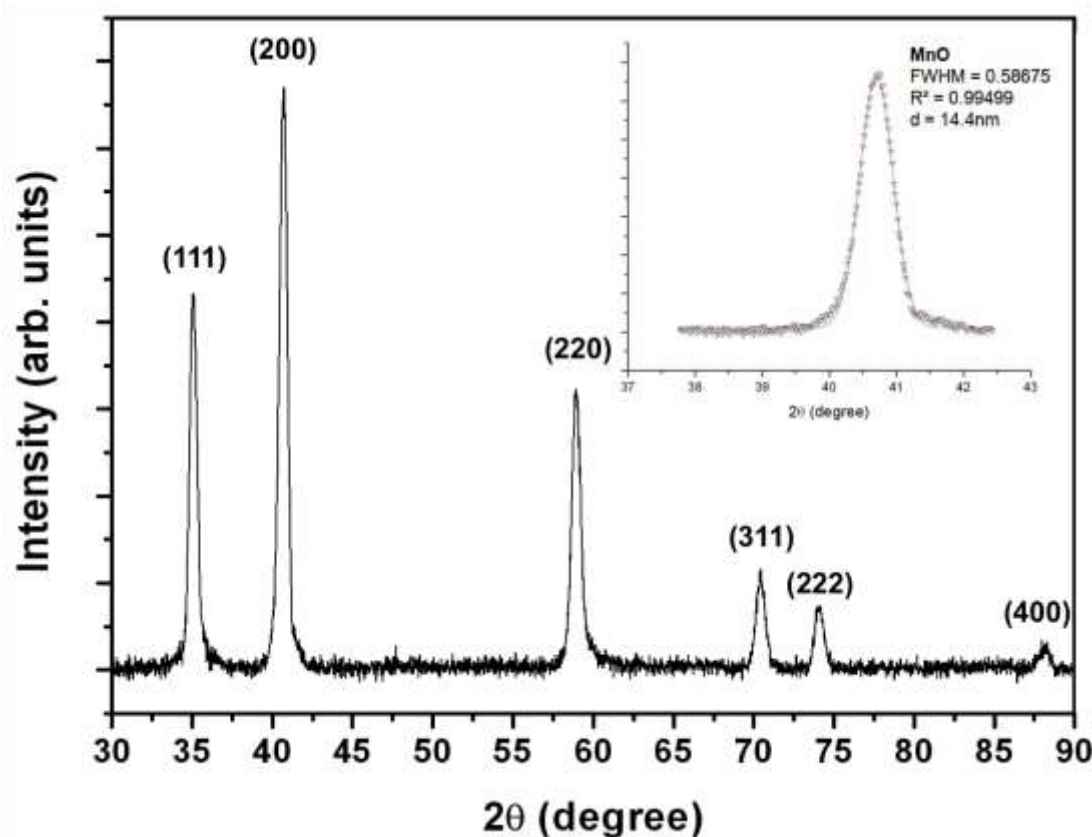

**Fig. S1** X-ray diffraction trace of MnO nanoparticles (MONPs). The average crystallite size of MONPs ( $d = 14.4\text{nm}$ ) is calculated using the Debye-Scherrer formula.

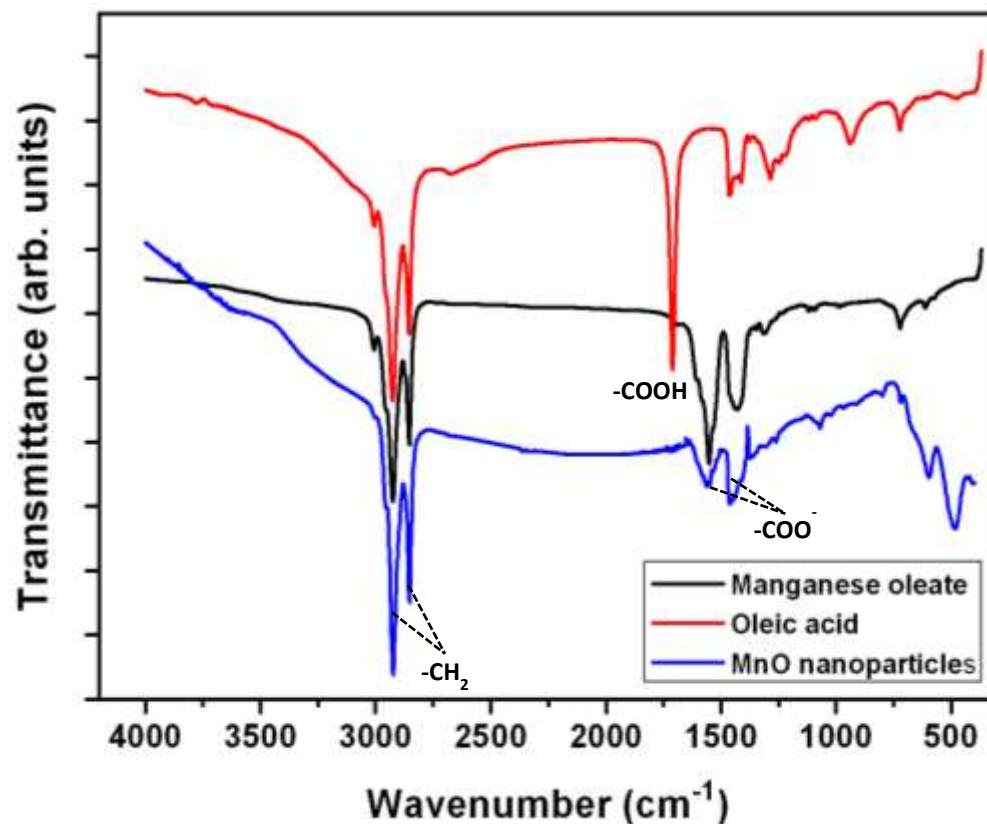

**Fig. S2** Figure S2: FT-IR spectra of oleic acid, manganese oleate and the as-synthesized MONPs. The four characteristic bands of oleyl group  $-\text{OOC}-(\text{CH}_2)_7-\text{CH}=\text{CH}-(\text{CH}_2)_7-\text{CH}_3$  are observed. While the bands at  $1555\text{ cm}^{-1}$  and  $1410\text{ cm}^{-1}$  can be assigned to the asymmetric and symmetric stretching modes of the carboxylate group, the bands at  $2925\text{ cm}^{-1}$  and  $2854\text{ cm}^{-1}$  are due to the symmetric and asymmetric stretching of the  $\text{CH}_2$  bond.

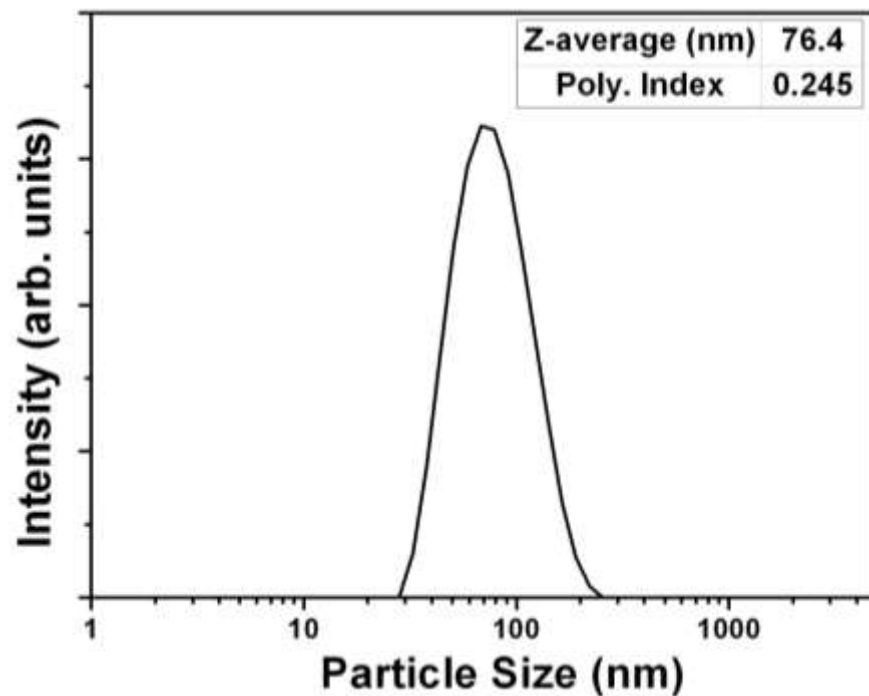

**Fig. S3** Hydrodynamic size distribution of PEO/SiO<sub>2</sub>-encapsulated MONPs (PEOMSN), measured by dynamic light scattering (DLS). The average hydrodynamic diameter was determined to be 76.4 nm.

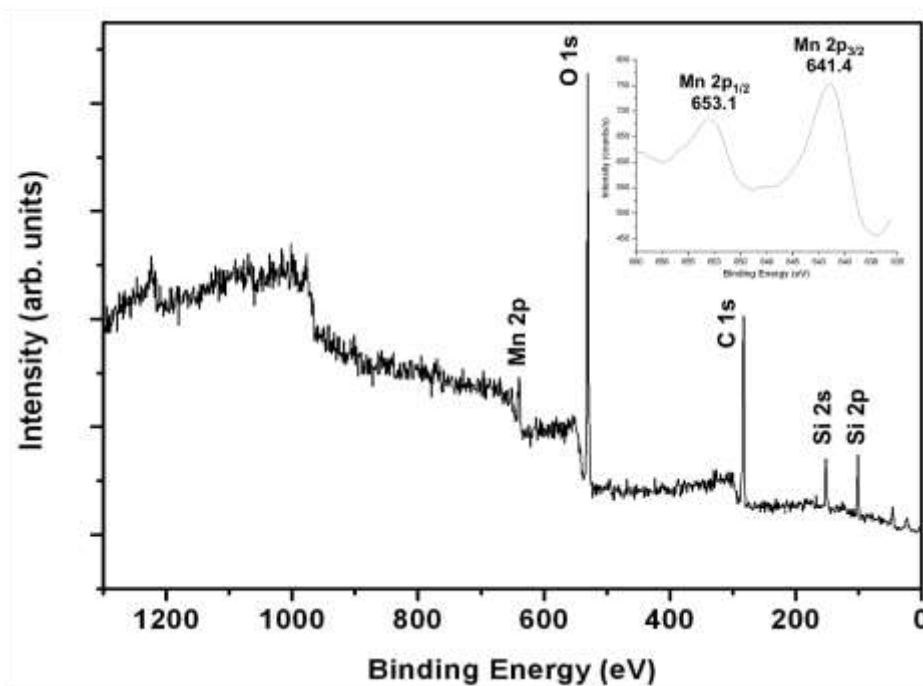

**Fig. S4** Wide-scan XPS spectrum of the as-prepared PEOMSN. The inset shows a high-resolution XPS scans of the Mn 2p region.

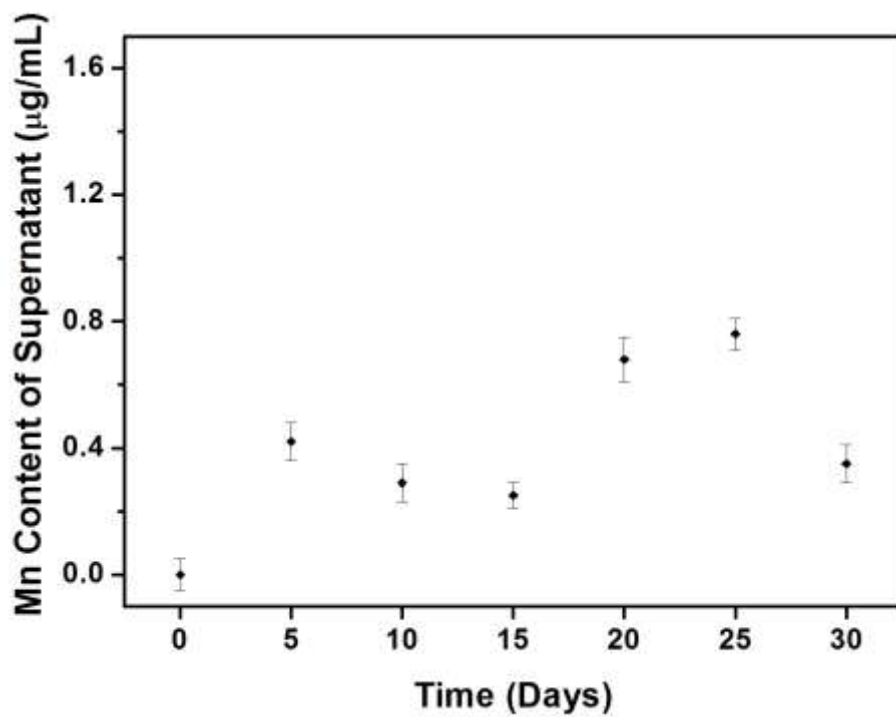

**Fig. S5** Mn-ion leaching experiments. The increase in Mn content of the supernatant of PEOMSN was determined over time.

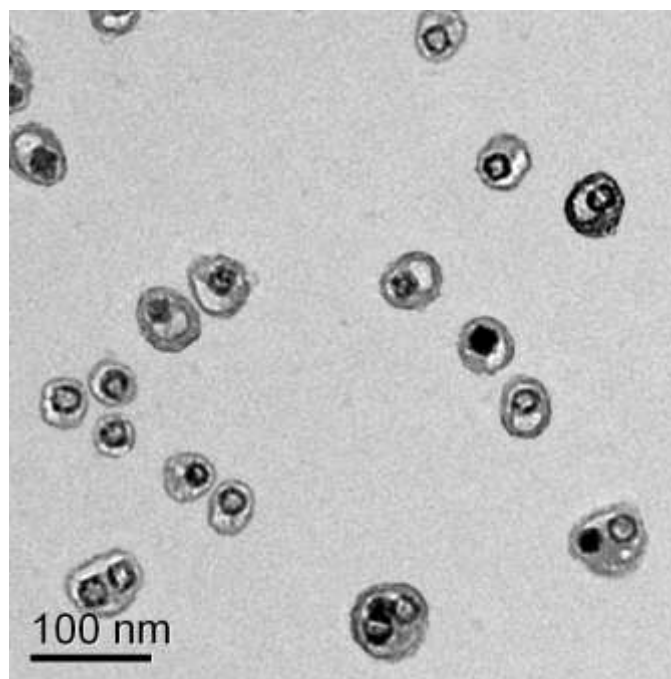

**Fig. S6** TEM images of PEOMSN after 16-hour acidic etch in an acetate buffer solution. Formation of hollow cavities within the encapsulated MONPs is observed.
